# Supplementary material for: Use of Age-Stage, Two-Sex Life Table to Compare the Fitness of Bactrocera dorsalis (Diptera: Tephritidae) on Northern and Southern Host Fruits in China
Source: MDPI journal article supplement (doi:10.3390/insects13030258), 2022-03-04
Supplement: s1 [file s1]

## Supplementary Materials

# Use of Age-Stage, Two-Sex Life Table to Compare the Fitness of *Bactrocera dorsalis* (Diptera: Tephritidae) on Northern and Southern Host Fruits in China

Yanfei Zhu, Fangjian Qi, Xiumei Tan, Tong Zhang, Ziwen Teng, Yinjun Fan, Fanghao Wan and Hongxu Zhou

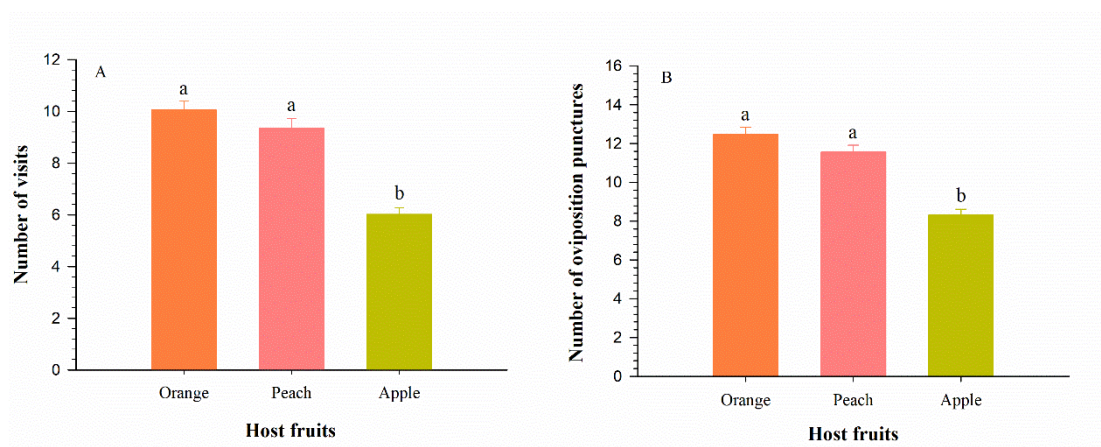

**Figure S1.** Damage of *Bactrocera dorsalis* on three host fruits. (A) Number of visits; (B) Number of oviposition punctures. Experimental methods and data processing reference. In Figure S1, the experimental and data processing methods were all referred to Jaleel et al., 2018.

## References

1. Jaleel, W.; Lu, L.H.; He, Y.R. Biology, taxonomy, and IPM strategies of *Bactrocera tau* Walker and complex species (Diptera: Tephritidae) in Asia: a comprehensive review. *Environ. Sci. Pollut. Res.* **2018**, *25*, 19346–19361.
